# Supplementary material for: Chemokine expression profile of an innate granuloma
Source: eLife. 2024 Nov 14;13:RP96425. doi: 10.7554/eLife.96425 (PMC11563579; doi:10.7554/eLife.96425)
Supplement: Figure 5—figure supplement 1—source data 1. [file elife-96425-fig5-figsupp1-data1.xlsx]

## Sheet: Figure 5-FS1-SD1
Bacterial Burdens - Liver and Spleen, Reparixin (3 DPI)
	PBS	Reparixin			PBS	Reparixin
Log10 CFU/Liver	6.47	6.46		Log10 CFU/Spleen	1.13	1.13
	6.01	6.44			1.13	1.13
	6.54	6.94			1.13	1.57
		6.93				2.28
Bacterial Burdens - Liver and Spleen, Reparixin (1 DPI)
	PBS	Reparixin			PBS	Reparixin
Log10 CFU/Liver	5.68	5.5		Log10 CFU/Spleen	1.13	1.13
	5.84	5.44			1.13	1.13
	6.01	5.38			1.13	1.42
	5.68	5.87			1.13	1.13
	5.87	5.28			1.42	1.13
		5.84				1.44
