# Supplementary material for: Chemokine expression profile of an innate granuloma
Source: eLife. 2024 Nov 14;13:RP96425. doi: 10.7554/eLife.96425 (PMC11563579; doi:10.7554/eLife.96425)
Supplement: Figure 5—figure supplement 1—source data 2. [file elife-96425-fig5-figsupp1-data2.xlsx]

## Sheet: Figure 5-FS1-SD2
Bacterial Burdens - Liver and Spleen, Reparixin (3 DPI)
	PBS	Reparixin			PBS	Reparixin
Log10 CFU/Liver	6.47	6.46		Log10 CFU/Spleen	1.13	1.13
	6.01	6.44			1.13	1.13
	6.54	6.94			1.13	1.57
		6.93				2.28
Flow Cytometry - Reparixin
	Count -Liver Neutrophils						Count -Spleen Neutrophils
	Female		Male				Female		Male
	PBS	Reparixin	PBS	Reparixin			PBS	Reparixin	PBS	Reparixin
	1897	935	1633	2735			569	424	744	786
	1105	609	1027	1393			735	413	739	681
	138	510	1571	1287			180	336	875	829
	Count -Liver Macrophages						Count -Spleen Macrophages
	Female		Male				Female		Male
	PBS	Reparixin	PBS	Reparixin			PBS	Reparixin	PBS	Reparixin
	1291	1608	1197	1407			329	414	478	424
	2015	1442	1794	1637			419	383	411	370
	572	1660	1772	1648			384	411	361	309
