# Supplementary material for: Chemokine expression profile of an innate granuloma
Source: eLife. 2024 Nov 14;13:RP96425. doi: 10.7554/eLife.96425 (PMC11563579; doi:10.7554/eLife.96425)
Supplement: Figure 6—figure supplement 1—source data 1. [file elife-96425-fig6-figsupp1-data1.xlsx]

## Sheet: Figure 6-FS1-SD1
Flow Cytometry - WT vs CCR2 (COUNTS)
	Count -Liver Neutrophils								Count -Spleen Neutrophils								Count -Blood Neutrophils
		WT			Ccr2-/-					WT			Ccr2-/-					WT			Ccr2-/-
	Uninfected	183	86	176	220	90	301		Uninfected	144	181	232	157	148	304		Uninfected	122	11	220	167	13	573
	Infected	1871	945	2275	3576	2747	4714		Infected	1284	888	1818	1605	876	628		Infected	3907	2497	4548	6701	2887	3637
	Count -Liver Macrophages								Count -Spleen Macrophages								Count -Blood Monocytes
		WT			Ccr2-/-					WT			Ccr2-/-					WT			Ccr2-/-
	Uninfected	317	224	829	176	150	382		Uninfected	175	244	464	146	230	414		Uninfected	140	19	72	24	12	19
	Infected	1433	1721	3312	577	438	326		Infected	389	654	919	218	278	226		Infected	197	158	392	35	79	108
