# Supplementary material for: Chemokine expression profile of an innate granuloma
Source: eLife. 2024 Nov 14;13:RP96425. doi: 10.7554/eLife.96425 (PMC11563579; doi:10.7554/eLife.96425)
Supplement: Figure 6—source data 1. [file elife-96425-fig6-data1.xlsx]

## Sheet: Figure 6-SD1
Survival Curve - WT vs CCR2
Day	WT	Ccr2-/-
5		1
6		1
6		1
6		1
7		1
8		1
9		1
9		1
9		1
21	0
21	0
21	0
21	0
21	0
21	0
21	0
21	0
21	0
21	0
