# Supplementary material for: Chemokine expression profile of an innate granuloma
Source: eLife. 2024 Nov 14;13:RP96425. doi: 10.7554/eLife.96425 (PMC11563579; doi:10.7554/eLife.96425)
Supplement: Figure 6—source data 2. [file elife-96425-fig6-data2.xlsx]

## Sheet: Figure 6-SD2
Bacterial Burdens - Liver - WT vs CCR2
	WT	Ccr2-/-
Log10 CFU/Liver	5.95	6.66
	5.72	7.79
	5.85	6.67
	5.95	8
	6.55	7.74
	5.66	7.23
	5.1	6.74
