# Supplementary material for: Chemokine expression profile of an innate granuloma
Source: eLife. 2024 Nov 14;13:RP96425. doi: 10.7554/eLife.96425 (PMC11563579; doi:10.7554/eLife.96425)
Supplement: Figure 6—source data 3. [file elife-96425-fig6-data3.xlsx]

## Sheet: Figure 6-SD3
Bacterial Burdens - Spleen - WT vs CCR2
	WT	Ccr2-/-
Log10 CFU/Spleen	1.2	2.11
	1.97	5.15
	1.2	1.79
	1.2	3.29
	1.46	2.59
	1.2	2.33
	1.2	2.25
