# Supplementary material for: Chemokine expression profile of an innate granuloma
Source: eLife. 2024 Nov 14;13:RP96425. doi: 10.7554/eLife.96425 (PMC11563579; doi:10.7554/eLife.96425)
Supplement: Figure 6—source data 4. [file elife-96425-fig6-data4.xlsx]

## Sheet: Figure6-SD4
Flow Cytometry - WT vs CCR2 (PERCENTS)
	Percent -Liver Neutrophils								Percent -Spleen Neutrophils								Percent -Blood Neutrophils
		WT			Ccr2-/-					WT			Ccr2-/-					WT			Ccr2-/-
	Uninfected	2.91	1.41	2.03	3.59	1.51	3.84		Uninfected	1.81	2.7	2.44	2.03	2.03	3.25		Uninfected	2.82	0.34	4.93	4.24	0.91	11.9
	Infected	27.7	16.5	25.9	56.4	43.3	56.5		Infected	17.7	12.1	19.4	21.4	16.8	13.4		Infected	66.4	50.7	61.4	87.5	46.7	82.2
	Percent -Liver Macrophages								Percent -Spleen Macrophages								Percent -Blood Monocytes
		WT			Ccr2-/-					WT			Ccr2-/-					WT			Ccr2-/-
	Uninfected	5.02	3.73	9.58	2.87	2.51	4.87		Uninfected	2.2	3.64	4.88	1.89	3.15	4.42		Uninfected	3.23	0.58	1.61	0.61	0.84	0.39
	Infected	21.2	30.1	37.7	9.09	6.9	3.91		Infected	5.37	8.9	9.81	2.9	5.35	4.81		Infected	3.35	3.21	5.29	0.46	1.28	2.44
	Liver Counts x10^6								Spleen Counts x10^6
		WT			Ccr2-/-					WT			Ccr2-/-
	Uninfected	3	3	5.75	2.25	3	3		Uninfected	25	60	40	20	27.5	40
	Infected	12	21	29.25	16	7	19.25		Infected	60	100	95	72.5	60	45
	Back-Calculated Neuts/Liver								Back-Calculated Neuts/Spleen
		WT			Ccr2-/-					WT			Ccr2-/-
	Uninfected	87300	42300	116725	80775	45300	115200		Uninfected	452500	1620000	976000	406000	558250	1300000
	Infected	3324000	3.465e+06	7575750	9024000	3031000	1.08762e+07		Infected	10620000	12100000	1.843e+07	15515000	10080000	6030000
	Back-Calculated Macs/Liver								Back-Calculated Macs/Spleen
		WT			Ccr2-/-					WT			Ccr2-/-
	Uninfected	150600	111900	550850	64575	75300	146100		Uninfected	550000	2184000	1952000	378000	866250	1.768e+06
	Infected	2544000	6321000	11027250	1454400	483000	752675		Infected	3222000	8900000	9.3195e+06	2102500	3210000	2164500
