# Supplementary material for: Chemokine expression profile of an innate granuloma
Source: eLife. 2024 Nov 14;13:RP96425. doi: 10.7554/eLife.96425 (PMC11563579; doi:10.7554/eLife.96425)
Supplement: Figure 7—figure supplement 4—source data 1. [file elife-96425-fig7-figsupp4-data1.xlsx]

## Sheet: Figure 7-FS4-SD1
CCL2 ELISA - WT vs CCR2 (Serum and Liver, 3 DPI)
Serum	WT - Uninfected	Ccr2-/- Uninfected	WT - Infected	Ccr2-/- Infected
pg/mL CCL2	68.13	228.65	221.06	2572.24
	125.89	480.13	338.82	3618.97
	131.25	184.49	426.6	5351.34
	152.65		595.93
	144.64		525.59
			470.47
			280.91
Liver	WT - Uninfected	Ccr2-/- Uninfected	WT - Infected	Ccr2-/- Infected
pg/mL CCL2	350.44	327.35	1529.07	3556.62
	367.12	484.95	2569.71	2921.62
	369.62	389.56	1846.48	3902.94
	414.31		2354.59
	357.1		2551.04
			3151.31
			2647.44
